# Supplementary material for: The Changing Character of Chinese Urbanization: 2000 - 2021
Source: Research Square preprint supplement (doi:10.21203/rs.3.rs-5479882/v1), 2025-02-11
Supplement: Supplementary file 1 [file 2c3e597226a2496a0e9de249.docx]

# Supplementary Information

**The Changing Character of Chinese Urbanization: 2000 - 2021**

Lulu Song1,2,3, José Lobo4*, Luís M. A. Bettencourt5,6,7**, Wei-Qiang Chen1,2,3***

1. Key Lab of Urban Environment and Health, Institute of Urban Environment, Chinese Academy of Sciences, Xiamen, Fujian Province, 361021, China
2. Xiamen Key Lab of Urban Metabolism, Xiamen, Fujian Province, 361021, China
3. University of Chinese Academy of Sciences, No.19 (A) Yuquan Road, Shijingshan District, Beijing, 100049, China
4. School of Sustainability, College of Global Futures, Arizona State University, Tempe, Arizona USA, 85287, USA
5. Department of Ecology and Evolution and Department of Sociology, University of Chicago, Chicago IL 60637, USA
6. Committee on Environment, Geography and Urbanization, University of Chicago, Chicago IL 60637, USA
7. Santa Fe Institute, 1399 Hyde Park Road, Santa Fe NM 87501, USA

*Email: [Jose.Lobo@asu.edu](mailto:Jose.Lobo@asu.edu)

**Email: bettencourt@uchicago.edu

***Email: [wqchen@iue.ac.cn](mailto:wqchen@iue.ac.cn)

## Data sources and data interpolation

We use data on 293 prefecture-level cities (PLCs) and 4 municipalities (Beijing, Shanghai, Chongqing, and Tianjin) in China to analyze the scaling behavior of cities. The data are derived from different kinds of Statistical Yearbooks in China. The dataset covers the period from 1994 to 2021. However, due to data paucity, we are only able to obtain records from 2006 onward for some variables.

**Table S1. Urban features and data sources were used in this study.**

| Spatial units | Features | Data source |
| --- | --- | --- |
| Urban districts | Registered Population  Resident Population  GDP  Built-up area  Other features* | *China City Statistical Yearbook (1994-2021)*1  *Statistical Yearbook for* each PLC *(2006-2021)*2  *China City Statistical Yearbook (1994-2021)*1  *China Urban Construction Statistical Yearbook (1994-2021)*3  *China City Statistical Yearbook (1994-2021)*1 |
| Prefecture-level cities | Resident Population  GDP  Built-up area  Other features* | *Statistical Yearbook for* each PLC *(2000-2021)*2  *China City Statistical Yearbook (2000-2021)*1  *China Urban Construction Statistical Yearbook*3and *China County Seat Construction Statistical Yearbook (2006-2021)*4  *China City Statistical Yearbook (2000-2021)*1 |

* Other features include sales value in whole- and retail sale trade, total retail sales of consumer goods, budgetary revenue of local government, budgetary expenditure of local government, expenditure of science administration, expenditure for education administration, deposit, and loan.

Our study examines scaling behavior based on two spatial units: PLCs and their corresponding urban districts, which are defined by administrative boundaries. According to the administrative divisions set by the Ministry of Civil Affairs of China (https://www.mca.gov.cn/mzsj/xzqh/2021/20211201.html), some PLCs do not have urban districts, whereas others consist entirely of urban districts (Table S2).

**Table S2. Prefecture-level cities with and without urban districts.**

| Type | Cities |
| --- | --- |
| All-district cities | Beijing, Tianjin, and Shanghai (municipalities)  Wuhan and Ezhou in Hubei province  Nanjing in Jiangsu province  Guangzhou, Shenzhen, Zhuhai, and Foshan in Guangdong province  Xiamen in Fujian province  Haikou and Sanya in Hainan province  Wuhai in Inner Mongolia province  Karamay in Xinjiang province |
| Cities without districts | Dongguan and Zhongshan in Guangdong province  Danzhou in Hainan province  Jiayuguan in Gansu province |

Our dataset comprises a comprehensive panel of data collected from multiple PLCs across various features over an extended period. Given the continuous nature of this dataset, it inevitably contains some missing values. To address these gaps effectively, we employ two primary imputation strategies:

**Linear Interpolation for Sporadic Missing Values:** For instances where a specific indicator for a city exhibits occasional missing values across consecutive years, we generally use linear interpolation. This method involves filling in the missing data points by leveraging values from surrounding years. By applying linear interpolation, we ensure a smooth transition between known data points, maintaining the temporal consistency of the dataset.

**Dynamic Imputation for Extended Missing Values:** In cases where a specific indicator has consecutive years of missing data, we adopt a more dynamic approach by utilizing related indicators to inform our imputation.

For example, we examine the changes in the resident population of urban districts. We reference the trends of temporary resident population in urban districts reported in the *China Urban Construction Statistical Yearbook*3, applying a proportional downscaling method to estimate the population of urban districts for the missing years based on observed patterns of the temporary resident population.

Additionally, the built-up area of each PLC is calculated by summing the built-up areas of urban districts, county-level cities, and counties. However, the built-up area of counties from 2006 to 2015 is missing. To estimate the built-up area for these years, we utilize the total built-up area of counties within each province, as reported in the *China Urban-Rural Construction Statistical Yearbook*5. Specifically, we analyze the total built-up area across counties in each province and consider the proportional distribution of built-up areas recorded in the *China County Seat Construction Statistical Yearbook*4 for 2015. This approach allows us to make informed estimates for the missing values, ensuring that our imputation accurately reflects the underlying spatial dynamics of urban development.

## Additional results and figures

**Table S3. Scaling coefficients (β, 95%CI, intercept, and R2) for GDP and built-up area for Chinese prefecture-level cities from 2000 to 2021.**

|  | **GDP** | | | | **Built-Up Area** | | | |
| --- | --- | --- | --- | --- | --- | --- | --- | --- |
| **Year** | **β** | **95% CI** | **intercept** | **R2** | **β** | **95% CI** | **intercept** | **R2** |
| 2000 | 0.97 | 0.87, 1.07 | -0.17 | 0.58 | n/a | n/a | n/a | n/a |
| 2001 | 0.97 | 0.87, 1.08 | -0.15 | 0.58 | n/a | n/a | n/a | n/a |
| 2002 | 1.01 | 0.91, 1.11 | -0.27 | 0.58 | n/a | n/a | n/a | n/a |
| 2003 | 1.01 | 0.90, 1.11 | -0.14 | 0.56 | n/a | n/a | n/a | n/a |
| 2004 | 1.02 | 0.91, 1.12 | -0.03 | 0.56 | n/a | n/a | n/a | n/a |
| 2005 | 0.98 | 0.87, 1.09 | 0.32 | 0.53 | n/a | n/a | n/a | n/a |
| 2006 | 0.99 | 0.88, 1.10 | 0.45 | 0.54 | 0.81 | 0.74, 0.88 | 0.04 | 0.63 |
| 2007 | 0.98 | 0.88, 1.09 | 0.64 | 0.54 | 0.77 | 0.71, 0.84 | 0.30 | 0.63 |
| 2008 | 0.98 | 0.88, 1.09 | 0.84 | 0.55 | 0.79 | 0.72, 0.85 | 0.27 | 0.64 |
| 2009 | 0.99 | 0.89, 1.09 | 0.90 | 0.56 | 0.79 | 0.72, 0.86 | 0.31 | 0.65 |
| 2010 | 1.01 | 0.91, 1.10 | 0.99 | 0.59 | 0.81 | 0.74, 0.87 | 0.25 | 0.68 |
| 2011 | 1.00 | 0.90, 1.09 | 1.22 | 0.60 | 0.82 | 0.75, 0.88 | 0.25 | 0.70 |
| 2012 | 0.99 | 0.90, 1.08 | 1.35 | 0.61 | 0.81 | 0.75, 0.87 | 0.31 | 0.70 |
| 2013 | 1.01 | 0.92, 1.10 | 1.34 | 0.64 | 0.83 | 0.77, 0.88 | 0.29 | 0.72 |
| 2014 | 1.03 | 0.95, 1.12 | 1.27 | 0.66 | 0.81 | 0.76, 0.87 | 0.40 | 0.73 |
| 2015 | 1.07 | 0.98, 1.15 | 1.12 | 0.69 | 0.84 | 0.78, 0.90 | 0.26 | 0.75 |
| 2016 | 1.10 | 1.02, 1.18 | 0.95 | 0.73 | 0.83 | 0.77, 0.88 | 0.38 | 0.76 |
| 2017 | 1.11 | 1.04, 1.18 | 0.96 | 0.76 | 0.83 | 0.78, 0.88 | 0.40 | 0.78 |
| 2018 | 1.11 | 1.04, 1.19 | 1.01 | 0.76 | 0.84 | 0.79, 0.89 | 0.36 | 0.79 |
| 2019 | 1.12 | 1.06, 1.19 | 1.00 | 0.79 | 0.85 | 0.80, 0.90 | 0.34 | 0.80 |
| 2020 | 1.12 | 1.06, 1.18 | 1.06 | 0.80 | 0.85 | 0.80, 0.89 | 0.36 | 0.81 |
| 2021 | 1.13 | 1.06, 1.19 | 1.11 | 0.80 | 0.86 | 0.81, 0.90 | 0.32 | 0.82 |

**Table S4. Scaling coefficients (β, 95%CI, intercept, and R2) for GDP and built-up area for urban districts (evaluated by registered population) from 2000 to 2021.**

|  | **GDP** | | | | **Built-Up Area** | | | |
| --- | --- | --- | --- | --- | --- | --- | --- | --- |
| **Year** | **β** | **95% CI** | **intercept** | **R2** | **β** | **95% CI** | **intercept** | **R2** |
| 1994 | 1.03 | 0.91, 1.15 | -0.62 | 0.53 | 0.67 | 0.56, 0.78 | 0.68 | 0.37 |
| 1995 | 1.06 | 0.94, 1.18 | -0.57 | 0.55 | 0.69 | 0.59, 0.79 | 0.65 | 0.41 |
| 1996 | 1.07 | 0.96, 1.19 | -0.50 | 0.57 | 0.72 | 0.62, 0.82 | 0.56 | 0.45 |
| 1997 | 1.09 | 0.98, 1.20 | -0.34 | 0.64 | 0.73 | 0.65, 0.82 | 0.62 | 0.56 |
| 1998 | 1.10 | 0.99, 1.22 | -0.39 | 0.63 | 0.75 | 0.66, 0.84 | 0.57 | 0.55 |
| 1999 | 1.11 | 1.00, 1.22 | -0.37 | 0.62 | 0.76 | 0.68, 0.84 | 0.54 | 0.60 |
| 2000 | 1.12 | 1.00, 1.24 | -0.41 | 0.58 | 0.78 | 0.69, 0.87 | 0.40 | 0.55 |
| 2001 | 1.15 | 1.04, 1.26 | -0.50 | 0.60 | 0.81 | 0.72, 0.89 | 0.29 | 0.59 |
| 2002 | 1.21 | 1.10, 1.32 | -0.72 | 0.65 | 0.85 | 0.77, 0.93 | 0.12 | 0.61 |
| 2003 | 1.25 | 1.14, 1.35 | -0.78 | 0.67 | 0.88 | 0.80, 0.95 | 0.04 | 0.64 |
| 2004 | 1.25 | 1.14, 1.36 | -0.64 | 0.66 | 0.89 | 0.81, 0.97 | 0.00 | 0.62 |
| 2005 | 1.22 | 1.12, 1.33 | -0.35 | 0.65 | 0.84 | 0.76, 0.92 | 0.28 | 0.60 |
| 2006 | 1.23 | 1.12, 1.33 | -0.23 | 0.64 | 0.88 | 0.80, 0.96 | 0.14 | 0.64 |
| 2007 | 1.22 | 1.11, 1.33 | -0.05 | 0.64 | 0.87 | 0.80, 0.95 | 0.19 | 0.63 |
| 2008 | 1.23 | 1.12, 1.33 | 0.08 | 0.65 | 0.86 | 0.78, 0.95 | 0.28 | 0.61 |
| 2009 | 1.23 | 1.13, 1.33 | 0.16 | 0.66 | 0.87 | 0.80, 0.95 | 0.26 | 0.64 |
| 2010 | 1.22 | 1.12, 1.32 | 0.37 | 0.66 | 0.89 | 0.81, 0.96 | 0.25 | 0.66 |
| 2011 | 1.20 | 1.10, 1.30 | 0.61 | 0.66 | 0.88 | 0.80, 0.95 | 0.34 | 0.65 |
| 2012 | 1.21 | 1.11, 1.31 | 0.69 | 0.67 | 0.87 | 0.80, 0.94 | 0.43 | 0.67 |
| 2013 | 1.22 | 1.13, 1.32 | 0.69 | 0.68 | 0.86 | 0.79, 0.93 | 0.50 | 0.66 |
| 2014 | 1.22 | 1.13, 1.32 | 0.72 | 0.69 | 0.89 | 0.82, 0.97 | 0.36 | 0.67 |
| 2015 | 1.22 | 1.13, 1.31 | 0.78 | 0.71 | 0.88 | 0.80, 0.95 | 0.48 | 0.67 |
| 2016 | 1.23 | 1.14, 1.32 | 0.74 | 0.71 | 0.87 | 0.80, 0.94 | 0.50 | 0.70 |
| 2017 | 1.21 | 1.12, 1.29 | 0.91 | 0.74 | 0.87 | 0.81, 0.93 | 0.50 | 0.74 |
| 2018 | 1.20 | 1.12, 1.28 | 1.02 | 0.75 | 0.88 | 0.82, 0.93 | 0.51 | 0.76 |
| 2019 | 1.19 | 1.11, 1.27 | 1.12 | 0.76 | 0.87 | 0.82, 0.93 | 0.53 | 0.76 |
| 2020 | 1.19 | 1.12, 1.27 | 1.11 | 0.77 | 0.86 | 0.80, 0.92 | 0.61 | 0.75 |
| 2021 | 1.20 | 1.12, 1.27 | 1.19 | 0.77 | 0.87 | 0.82, 0.93 | 0.56 | 0.78 |

**Table S5. Scaling coefficients (β, 95%CI, intercept, and R2) for GDP and built-up area for urban districts (evaluated by resident population) from 2000 to 2021.**

|  | **GDP** | | | | **Built-Up Area** | | | |
| --- | --- | --- | --- | --- | --- | --- | --- | --- |
| **Year** | **β** | **95% CI** | **intercept** | **R2** | **β** | **95% CI** | **intercept** | **R2** |
| 2006 | 1.13 | 1.04, 1.22 | -0.06 | 0.68 | 0.78 | 0.71, 0.85 | 0.40 | 0.63 |
| 2007 | 1.14 | 1.05, 1.23 | 0.04 | 0.70 | 0.80 | 0.73, 0.86 | 0.36 | 0.65 |
| 2008 | 1.15 | 1.06, 1.23 | 0.16 | 0.71 | 0.81 | 0.74, 0.88 | 0.33 | 0.66 |
| 2009 | 1.15 | 1.07, 1.23 | 0.25 | 0.72 | 0.81 | 0.75, 0.88 | 0.35 | 0.68 |
| 2010 | 1.17 | 1.08, 1.25 | 0.32 | 0.74 | 0.83 | 0.77, 0.89 | 0.28 | 0.71 |
| 2011 | 1.16 | 1.08, 1.24 | 0.53 | 0.74 | 0.83 | 0.77, 0.89 | 0.33 | 0.70 |
| 2012 | 1.14 | 1.05, 1.22 | 0.72 | 0.72 | 0.80 | 0.73, 0.86 | 0.55 | 0.68 |
| 2013 | 1.16 | 1.09, 1.24 | 0.71 | 0.76 | 0.81 | 0.75, 0.87 | 0.53 | 0.72 |
| 2014 | 1.18 | 1.11, 1.26 | 0.67 | 0.78 | 0.86 | 0.80, 0.92 | 0.36 | 0.74 |
| 2015 | 1.21 | 1.14, 1.28 | 0.60 | 0.81 | 0.87 | 0.81, 0.92 | 0.35 | 0.78 |
| 2016 | 1.22 | 1.15, 1.28 | 0.62 | 0.81 | 0.85 | 0.80, 0.90 | 0.44 | 0.80 |
| 2017 | 1.23 | 1.16, 1.29 | 0.64 | 0.83 | 0.87 | 0.83, 0.92 | 0.37 | 0.82 |
| 2018 | 1.23 | 1.16, 1.29 | 0.71 | 0.84 | 0.89 | 0.84, 0.93 | 0.33 | 0.83 |
| 2019 | 1.22 | 1.16, 1.28 | 0.79 | 0.85 | 0.88 | 0.83, 0.92 | 0.39 | 0.83 |
| 2020 | 1.20 | 1.15, 1.25 | 0.90 | 0.87 | 0.87 | 0.83, 0.92 | 0.43 | 0.85 |
| 2021 | 1.24 | 1.18, 1.29 | 0.81 | 0.87 | 0.87 | 0.83, 0.92 | 0.43 | 0.85 |

**Figure. S1. Scaling relations of the GDP vs. population size for Chinese prefecture-level cities (PLCs) (a), urban districts (b), and rural and suburban districts (c) during 2000-2021.**

**Figure. S2. GDP and built-up area dynamics of different size prefecture-level cities (PLC) during 2006-2021.** The GDP changes and growth rates in large cities (with a population in PLC > 6 million), medium-sized cities (with a population > 3 million but < 6 million in PLC), and small cities (with a population of < 3 million in PLCs) from 2006 to 2021, considering both urban and non-urban districts. The proportions of GDP in urban and non-urban districts are depicted, along with the overall GDP variation rate **(a).** Similar to (a), the built-up area changes and growth rates in different-sized cities during 2006-2021 **(b)**.

**Figure S3. The trajectory of GDP (a) and built-up area (b) changes vs population growth between the 13th (2016-2020) and 12th (2011-2015) Five-Year Plan periods in prefecture-level cities (PLCs).**

**Figure. S4. The average population change rate of each prefecture-level city during the 13th (2016-2020) and 12th (2011-2015) Five-Year Plan periods.**

**Figure S5. Temporal evolution of the scaling exponents with a 95% confidence interval for GDP (a) and built-up area (BUA) (b) for Chinese prefecture-level cities and their urban districts.** The registered population in urban districts = RGP in UD, the resident population in urban districts = RP in UD, and the resident population in prefecture-level cities = RP in PLC.

## References

1 National Bureau of Statistics. China City Statistical Yearbook, <https://data.cnki.net/yearBook/single?id=N2024050590&pinyinCode=YZGCA>. (1994-2021).

2 Municipal Bureau of Statistics. Statistical Yearbook for each PLC. <https://szjk.cnki.net/dpi/search-center/#/data-easysearchReplace?dimensionId=e753e340d53e414687f9f04eabd79b7d&type=1>. (2006-2021).

3 Ministry of Housing and Urban-Rural Development of China. China Urban Construction Statistical Yearbook, <https://www.mohurd.gov.cn/gongkai/fdzdgknr/sjfb/tjxx/jstjnj/index.html>. (1994-2001).

4 Ministry of Housing and Urban-Rural Development of China. China County Seat Construction Statistical Yearbook. <https://data.cnki.net/yearBook/single?id=N2023110035&pinyinCode=YJSTC>. (2006-2021).

5 Ministry of Housing and Urban-Rural Development of China. China Urban-Rural Construction Statistical Yearbook. <https://www.mohurd.gov.cn/gongkai/fdzdgknr/sjfb/tjxx/jstjnj/index.html>. (2006-2015).
